# Supplementary material for: Incidence of Exposure of Patients in the United States to Multiple Drugs for Which Pharmacogenomic Guidelines Are Available
Source: PLoS One. 2016 Oct 20;11(10):e0164972. doi: 10.1371/journal.pone.0164972 (PMC5072717; doi:10.1371/journal.pone.0164972)
Supplement: S5 Table — (XLSX) [file pone.0164972.s005.xlsx]

## Sheet: Clinical significance
Number of expected drug-phenotype co-occurrences of highest priority according to DPWG guidelines in the Medicaid insurance population, broken down by age and clinical significance
0-13	Sum in %	absolute frequency
C	0.00222214	9225
D	0.000522105	2167
E	3.58697e-05	148
F	3.78507e-05	157
Sum	0.00281796	11697	0.00281753
14-39	Sum in %	absolute frequency
C	0.0131059	39739
D	0.00155939	4728
E	3.5963e-05	109
F	0.000449112	1361
Sum	0.0151503	45937	0.0151498
40-64	Sum in %	absolute frequency
C	0.024479	27680
D	0.00596004	6739
E	0.000669559	757
F	0.0121554	13745
Sum	0.043264	35176	0.0311073
Number of expected drug-phenotype co-occurrences of highest priority (level A) according to CPIC in the Medicaid insurance population, broken down by age and clinical significance
	0-13	14-39	40-64
CPIC level A:	1919 (0%)	12149 (0,4%)	11252 (1%)
Assignment of diplotypes / phenotypes to DPWG clinical significance classes C – F
CYP2C9	Glimepiride	Phenytoin
*1/*1	AA	A	EM
*2/*2	AA	A	PM
*1/*3	AA	D	PM
*2/*3	D	A	PM
*3/*3	D	D	PM
CYP2C19	Clopidogrel	Sertraline
IM	F	A
PM	F	C
UM	A	none
CYP2D6	Amitriptyline	Clomipramine	Doxepin	Imipramine	Aripiprazole	Codeine	Haloperidol	Metoprolol	Nortriptyline	Paroxetine	Propafenone	Risperidone
IM	C	C	A	A	A	A	A	B	C	A	A	C
PM	A	C	F	C	C	B	C	C	C	A	C	D
UM	C	C	A	A	none	F	C	D	C	C	D	C
CYP3A5	Tacrolimus
*1/*1	B	EM
*1/*3	D	IM
DPYD	Capecitabine	Fluorouracil
IM	F	F
PM	F	F
UGT1A1	Irinotecan
*1/*28	F	IM
*28/*28	E	PM
TPMT	Azathioprine	Mercaptopurine	Thioguanine
IM	E	E	D
PM	F	F	F

## Sheet: Overview drugs, phenotypes
Medicaid
0-13	CYP2C9	CYP2C19	CYP2D6	CYP3A5	DPYD	UGT1A1	TPMT
EM	989	64585	446787	93	8	76	1733
IM	172	51848	42527	278	0	69	147
PM	139	7631	20316	369	0	18	1
UM	0	43711	19527
14-39	CYP2C9	CYP2C19	CYP2D6	CYP3A5	DPYD	UGT1A1	TPMT
EM	15701	235129	1219230	185	345	112	2833
IM	2603	191150	117818	566	15	101	241
PM	2152	28950	53623	790	0	27	4
UM	0	156337	52665
40-64	CYP2C9	CYP2C19	CYP2D6	CYP3A5	DPYD	UGT1A1	TPMT
EM	43003	183898	704101	235	3173	868	1795
IM	7110	151262	66717	718	138	760	148
PM	5984	23771	30683	964	1	200	3
UM	0	119674	29862
SCLO1B1	0-13	14-39	40-64		VKORC1	0-13	14-39	40-64
None	426	19622	86165		-1639G>A(rs9923231)	75	2164	7161
Intermediate Function(%)	103	4652	21085		*1/undefined	284	7797	23144
Low Function(%)	8	365	1667

## Sheet: CYP2C9
CYP2C9
0-13	EM(%)	IM(%)	PM(%)	EM	IM	PM
glimepiride	1.00495e-05	1.76251e-06	1.4362e-06	41	7	5
Tolbutamide	0	0	0	0	0	0
Phenytoin	0.000162984	2.85848e-05	2.32926e-05	676	118	96
Warfarin	6.55958e-05	1.15044e-05	9.37449e-06	272	47	38
Sum				989	172	139
14-39	EM(%)	IM(%)	PM(%)	EM	IM	PM
glimepiride	0.000857275	0.000142148	0.000117592	2599	431	356
Tolbutamide	0	0	0	0	0	0
Phenytoin	0.0018001	0.000298481	0.000246918	5458	905	748
Warfarin	0.0025212	0.000418049	0.000345831	7644	1267	1048
Sum				15701	2603	2152
40-64	EM(%)	IM(%)	PM(%)	EM	IM	PM
glimepiride	0.0103718	0.00171491	0.00144354	11728	1939	1632
Tolbutamide	6.77898e-07	1.12085e-07	9.43492e-08	0	0	0
Phenytoin	0.00711521	0.00117645	0.000990289	8045	1330	1119
Warfarin	0.0205437	0.00339675	0.00285925	23230	3841	3233
Sum				43003	7110	5984

## Sheet: CYP2C19
CYP2C19
0-13	EM(%)	IM(%)	PM(%)	UM(%)	EM	IM	PM	UM
Citalopram	0.00125136	0.0010046	0.000147976	0.000846933	5195	4170	614	3516
clopidogrel	1.00139e-05	8.03915e-06	1.18416e-06	6.77747e-06	41	33	4	28
Escitalopram	0.000544644	0.00043724	6.44049e-05	0.000368619	2261	1815	267	1530
Esomeprazole	0.000536206	0.000430466	6.34072e-05	0.000362909	2226	1787	263	1506
lansoprazole	0.00527027	0.00423097	0.000623217	0.00356696	21879	17564	2587	14808
Omeprazole	0.00379424	0.00304602	0.000448674	0.00256797	15751	12645	1862	10660
pantoprazole	0.000131849	0.000105849	1.55914e-05	8.92367e-05	547	439	64	370
rabeprazole	6.49048e-06	5.21056e-06	7.67508e-07	4.39281e-06	26	21	3	18
Sertraline	0.0022917	0.00183977	0.000270996	0.00155104	9513	7637	1125	6439
voriconazole	2.80018e-05	2.24798e-05	3.31125e-06	1.89518e-05	116	93	13	78
Amitriptyline	0.000786275	0.000631222	9.29782e-05	0.000532157	3264	2620	385	2209
Clomipramine	1.5948e-05	1.28031e-05	1.88588e-06	1.07938e-05	66	53	7	44
Doxepin	0.00011006	8.83562e-05	1.30147e-05	7.44895e-05	456	366	54	309
Imipramine	0.000781639	0.0006275	9.24299e-05	0.000529019	3244	2605	383	2196
Trimipramine	9.27211e-08	7.44365e-08	1.09644e-08	6.27544e-08	0	0	0	0
Sum					64585	51848	7631	43711
14-39	EM(%)	IM(%)	PM(%)	UM(%)	EM	IM	PM	UM
Citalopram	0.0185816	0.0151059	0.00228831	0.0123549	56342	45804	6938	37462
clopidogrel	0.000307985	0.000250378	3.79282e-05	0.00020478	933	759	115	620
Escitalopram	0.00606917	0.00493395	0.000747416	0.00403541	18402	14960	2266	12236
Esomeprazole	0.00376759	0.00306287	0.000463977	0.00250508	11424	9287	1406	7595
lansoprazole	0.00232149	0.00188726	0.00028589	0.00154356	7039	5722	866	4680
Omeprazole	0.0175695	0.0142832	0.00216367	0.011682	53274	43309	6560	35422
pantoprazole	0.00358373	0.00291341	0.000441335	0.00238283	10866	8834	1338	7225
rabeprazole	0.000147082	0.000119571	1.81131e-05	9.77953e-05	445	362	54	296
Sertraline	0.0164372	0.0133627	0.00202423	0.0109291	49840	40518	6137	33139
voriconazole	4.29835e-05	3.49436e-05	5.2934e-06	2.85798e-05	130	105	16	86
Amitriptyline	0.00677948	0.0055114	0.000834889	0.00450769	20556	16711	2531	13668
Clomipramine	0.000163946	0.00013328	2.01899e-05	0.000109008	497	404	61	330
Doxepin	0.00125223	0.001018	0.000154211	0.000832609	3796	3086	467	2524
Imipramine	0.00051707	0.000420354	6.36769e-05	0.000343801	1567	1274	193	1042
Trimipramine	6.08616e-06	4.94777e-06	7.49508e-07	4.0467e-06	18	15	2	12
Sum					235129	191150	28950	156337
40-64	EM(%)	IM(%)	PM(%)	UM(%)	EM	IM	PM	UM
Citalopram	0.0295178	0.02428	0.00381663	0.0192093	33378	27455	4315	21721
clopidogrel	0.0115809	0.0095259	0.0014974	0.0075365	13095	10771	1693	8522
Escitalopram	0.00964479	0.00793336	0.00124706	0.00627655	10906	8971	1410	7097
Esomeprazole	0.0146546	0.0120542	0.00189483	0.00953677	16571	13630	2142	10784
lansoprazole	0.00522215	0.0042955	0.00067522	0.00339842	5905	4857	763	3842
Omeprazole	0.0422903	0.034786	0.0054681	0.0275213	47821	39335	6183	31120
pantoprazole	0.0118745	0.00976738	0.00153536	0.00772755	13427	11044	1736	8738
rabeprazole	0.000618069	0.000508395	7.99158e-05	0.000402221	698	574	90	454
Sertraline	0.0172009	0.0141487	0.00222407	0.0111939	19450	15999	2514	12657
voriconazole	0.000118245	9.72629e-05	1.5289e-05	7.69505e-05	133	109	17	87
Amitriptyline	0.0154415	0.0127015	0.00199658	0.0100489	17461	14362	2257	11363
Clomipramine	0.000256877	0.000211295	3.3214e-05	0.000167168	290	238	37	189
Doxepin	0.00345187	0.00283935	0.000446325	0.00224638	3903	3210	504	2540
Imipramine	0.000750245	0.000617117	9.70061e-05	0.000488237	848	697	109	552
Trimipramine	1.12129e-05	9.22321e-06	1.44982e-06	7.29703e-06	12	10	1	8
Sum					183898	151262	23771	119674

## Sheet: CYP2D6
CYP2D6
0-13	EM(%)	IM(%)	PM(%)	UM(%)	EM	IM	PM	UM
Amitriptyline	0.00172455	0.000164197	7.84574e-05	7.54226e-05	7159	681	325	313
Clomipramine	3.49792e-05	3.33042e-06	1.59135e-06	1.5298e-06	145	13	6	6
Doxepin	0.000241397	2.29838e-05	1.09822e-05	1.05574e-05	1002	95	45	43
Imipramine	0.00171439	0.000163229	7.79948e-05	7.49779e-05	7117	677	323	311
Trimipramine	2.03367e-07	1.93629e-08	9.25206e-09	8.89417e-09	0	0	0	0
aripiprazole	0.00459122	0.000437137	0.000208874	0.000200795	19060	1814	867	833
carvedilol	6.95516e-05	6.62211e-06	3.1642e-06	3.04181e-06	288	27	13	12
Clozapine	2.03367e-05	1.93629e-06	9.25206e-07	8.89417e-07	84	8	3	3
Codeine	0.0740818	0.00705344	0.0033703	0.00323993	307551	29282	13991	13450
Desipramine	1.64728e-05	1.5684e-06	7.49417e-07	7.20428e-07	68	6	3	2
duloxetine	6.08068e-05	5.78951e-06	2.76637e-06	2.65936e-06	252	24	11	11
Flecainide	1.78963e-05	1.70394e-06	8.14181e-07	7.82687e-07	74	7	3	3
Haloperidol	0.000159643	1.51999e-05	7.26287e-06	6.98193e-06	662	63	30	28
Metoprolol	8.5821e-05	8.17115e-06	3.90437e-06	3.75334e-06	356	33	16	15
Mirtazapine	0.00241072	0.000229528	0.000109674	0.000105432	10008	952	455	437
Nortriptyline	0.000265598	2.5288e-05	1.20832e-05	1.16158e-05	1102	104	50	48
olanzapine	0.000684941	6.52143e-05	3.11609e-05	2.99556e-05	2843	270	129	124
Oxycodone	0.00563287	0.000536314	0.000256263	0.000246351	23384	2226	1063	1022
Paroxetine	0.000445984	4.24629e-05	2.02898e-05	1.95049e-05	1851	176	84	80
Propafenone	5.89765e-06	5.61524e-07	2.6831e-07	2.57931e-07	24	2	1	1
Risperidone	0.00917024	0.000873112	0.000417194	0.000401056	38070	3624	1731	1664
Tamoxifen	7.52459e-06	7.16428e-07	3.42326e-07	3.29084e-07	31	2	1	1
tomoxetine	0.00516431	0.000491702	0.000234947	0.000225859	21439	2041	975	937
Tramadol	0.000885461	8.43061e-05	4.02835e-05	3.87252e-05	3675	349	167	160
venlafaxine	0.000130765	1.24503e-05	5.94907e-06	5.71895e-06	542	51	24	23
Sum					446787	42527	20316	19527
14-39	EM(%)	IM(%)	PM(%)	UM(%)	EM	IM	PM	UM
Amitriptyline	0.0148951	0.00143954	0.000655272	0.000643548	45164	4364	1986	1951
Clomipramine	0.000360203	3.48119e-05	1.58462e-05	1.55627e-05	1092	105	48	47
Doxepin	0.00275125	0.000265895	0.000121034	0.000118869	8342	806	366	360
Imipramine	0.00113605	0.000109793	4.99775e-05	4.90834e-05	3444	332	151	148
Trimipramine	1.33718e-05	1.29232e-06	5.88259e-07	5.77735e-07	40	3	1	1
aripiprazole	0.0160568	0.00155181	0.000706377	0.000693739	48687	4705	2141	2103
carvedilol	0.00236431	0.000228498	0.000104012	0.000102151	7169	692	315	309
Clozapine	0.000508686	4.9162e-05	2.23784e-05	2.1978e-05	1542	149	67	66
Codeine	0.0894394	0.00864387	0.00393466	0.00386426	271197	26209	11930	11717
Desipramine	0.000219521	2.12156e-05	9.65726e-06	9.48448e-06	665	64	29	28
duloxetine	0.00947895	0.000916094	0.000417002	0.000409542	28741	2777	1264	1241
Flecainide	8.83097e-05	8.5347e-06	3.88496e-06	3.81546e-06	267	25	11	11
Haloperidol	0.0030471	0.000294488	0.00013405	0.000131651	9239	892	406	399
Metoprolol	0.0078214	0.0007559	0.000344083	0.000337927	23715	2292	1043	1024
Mirtazapine	0.00856772	0.000828027	0.000376915	0.000370172	25978	2510	1142	1122
Nortriptyline	0.00343934	0.000332396	0.000151305	0.000148598	10428	1007	458	450
olanzapine	0.00530833	0.000513024	0.000233527	0.000229349	16095	1555	708	695
Oxycodone	0.126814	0.012256	0.00557887	0.00547906	384524	37162	16916	16613
Paroxetine	0.0114466	0.00110625	0.000503562	0.000494553	34708	3354	1526	1499
Propafenone	3.00866e-05	2.90772e-06	1.32358e-06	1.2999e-06	91	8	4	3
Risperidone	0.0152007	0.00146907	0.000668716	0.000656752	46091	4454	2027	1991
Tamoxifen	0.000186927	1.80656e-05	8.22338e-06	8.07625e-06	566	54	24	24
tomoxetine	0.00397784	0.000384438	0.000174995	0.000171864	12061	1165	530	521
Tramadol	0.0696987	0.00673603	0.00306622	0.00301136	211339	20424	9297	9131
venlafaxine	0.0092494	0.000893909	0.000406904	0.000399624	28045	2710	1233	1211
Sum					1219230	117818	53623	52665
40-64	EM(%)	IM(%)	PM(%)	UM(%)	EM	IM	PM	UM
Amitriptyline	0.0340352	0.00322553	0.00148378	0.001444	38486	3647	1677	1632
Clomipramine	0.000566192	5.36582e-05	2.46834e-05	2.40216e-05	640	60	27	27
Doxepin	0.00760839	0.00072105	0.000331691	0.000322798	8603	815	375	365
Imipramine	0.00165364	0.000156716	7.20911e-05	7.01583e-05	1869	177	81	79
Trimipramine	2.47147e-05	2.34222e-06	1.07745e-06	1.04856e-06	27	2	1	1
aripiprazole	0.0219976	0.00208472	0.000958994	0.000933284	24874	2357	1084	1055
carvedilol	0.0321052	0.00304262	0.00139964	0.00136211	36304	3440	1582	1540
Clozapine	0.00108595	0.000102916	4.73424e-05	4.60732e-05	1227	116	53	52
Codeine	0.0611083	0.00579126	0.00266404	0.00259262	69101	6548	3012	2931
Desipramine	0.000641085	6.07559e-05	2.79483e-05	2.71991e-05	724	68	31	30
duloxetine	0.0331949	0.00314589	0.00144714	0.00140835	37536	3557	1636	1592
Flecainide	0.000477818	4.5283e-05	2.08307e-05	2.02722e-05	540	51	23	22
Haloperidol	0.00813788	0.000771231	0.000354774	0.000345263	9202	872	401	390
Metoprolol	0.0619433	0.0058704	0.00270044	0.00262805	70045	6638	3053	2971
Mirtazapine	0.0212554	0.00201438	0.000926638	0.000901795	24035	2277	1047	1019
Nortriptyline	0.00843221	0.000799124	0.000367606	0.00035775	9535	903	415	404
olanzapine	0.00987166	0.000935541	0.000430359	0.000418821	11162	1057	486	473
Oxycodone	0.135246	0.0128173	0.00589609	0.00573802	152935	14493	6667	6488
Paroxetine	0.0200916	0.00190409	0.0008759	0.000852417	22719	2153	990	963
Propafenone	0.000334772	3.17265e-05	1.45945e-05	1.42032e-05	378	35	16	16
Risperidone	0.0202623	0.00192027	0.000883344	0.000859662	22912	2171	998	972
Tamoxifen	0.00260703	0.000247069	0.000113654	0.000110607	2948	279	128	125
tomoxetine	0.00101855	9.6528e-05	4.44039e-05	4.32135e-05	1151	109	50	48
Tramadol	0.118292	0.0112106	0.00515699	0.00501874	133764	12676	5831	5675
venlafaxine	0.0206795	0.0019598	0.00090153	0.00087736	23384	2216	1019	992
Sum					704101	66717	30683	29862

## Sheet: CYP3A5
CYP3A5
0-13	EM(%)	IM(%)	PM(%)	EM	IM	PM
Tacrolimus	2.25599e-05	6.71102e-05	8.90602e-05	93	278	369
14-39	EM(%)	IM(%)	PM(%)	EM	IM	PM
Tacrolimus	6.13275e-05	0.000186897	0.000260648	185	566	790
40-64	EM(%)	IM(%)	PM(%)	EM	IM	PM
Tacrolimus	0.000208411	0.000635043	0.000852695	235	718	964

## Sheet: DPYD
DPYD
0-13	EM(%)	IM(%)	PM(%)	EM	IM	PM
capecitabine	6.92037e-07	3.01238e-08	4.68986e-10	2	0	0
Fluorouracil	1.61475e-06	7.02889e-08	1.0943e-09	6	0	0
Sum				8	0	0
14-39	EM(%)	IM(%)	PM(%)	EM	IM	PM
capecitabine	6.96954e-05	3.13929e-06	4.98861e-08	211	9	0
Fluorouracil	4.44663e-05	2.00289e-06	3.18278e-08	134	6	0
Sum				345	15	0
40-64	EM(%)	IM(%)	PM(%)	EM	IM	PM
capecitabine	0.00172561	7.54961e-05	1.16502e-06	1951	85	1
Fluorouracil	0.00108126	4.73055e-05	7.29993e-07	1222	53	0
Sum				3173	138	1

## Sheet: UGT1A1
UGT1A1
0-13	EM(%)	IM(%)	PM(%)	EM	IM	PM
irinotecan	1.83306e-05	1.67097e-05	8.02818e-06	76	69	18
14-39	EM(%)	IM(%)	PM(%)	EM	IM	PM
irinotecan	3.71206e-05	3.36384e-05	9.0512e-06	112	101	27
40-64	EM(%)	IM(%)	PM(%)	EM	IM	PM
irinotecan	0.000767847	0.000672655	0.000176941	868	760	200

## Sheet: TPMT
TPMT
0-13	EM(%)	IM(%)	PM(%)	EM	IM	PM
6-Mercaptopurine	0.000234283	2.00966e-05	4.67356e-07	972	83	1
Azathioprine	7.79468e-05	6.6862e-06	1.55491e-07	323	27	0
Thioguanine	0.000105627	9.06056e-06	2.10708e-07	438	37	0
Sum				1733	147	1
14-39	EM(%)	IM(%)	PM(%)	EM	IM	PM
6-Mercaptopurine	0.000276006	2.35578e-05	2.68495e-07	836	71	1
Azathioprine	0.000622378	5.31215e-05	6.05441e-07	1887	161	3
Thioguanine	3.63964e-05	3.10652e-06	3.54059e-08	110	9	0
Sum				2833	241	4
40-64	EM(%)	IM(%)	PM(%)	EM	IM	PM
6-Mercaptopurine	0.000183325	1.52971e-05	3.521e-07	207	17	0
Azathioprine	0.00139735	0.000116598	2.68379e-06	1580	131	3
Thioguanine	7.33302e-06	6.11884e-07	1.4084e-08	8	0	0
Sum				1795	148	3

## Sheet: VKORC1
VKORC1
0-13	medication use in %	-1639G>A(rs9923231)	*1/undefined
Warfarin	1.8189e-05	75	284
14-39	medication use in %	-1639G>A(rs9923231)
Warfarin	0.000713859	2164	7797
40-64	medication use in %	-1639G>A(rs9923231)
Warfarin	0.00633315	7161	23144

[truncated: 4 more sheets: SLCO1B1, phenotypes, medications most frequent incid, population distribution in medi]
